# Supplementary material for: Remarkable difference in pre-cation exchange reactions of inorganic nanoparticles in cases with eventual complete exchange
Source: Royal Society of Chemistry journal article supplement (doi:10.1039/d2nj03442e), 2022-01-01
Supplement: d2nj03442e1.pdf [file d2nj03442e1.pdf]

**Electronic Supplementary Information (New Journal of Chemistry)**

**Remarkable Difference in Pre-Cation Exchange Reactions of Inorganic Nanoparticles  
in Cases with Eventual Complete Exchange**

Madhumita Bhar,<sup>1</sup> Saoni Rudra,<sup>1</sup> Nayan Bhunia,<sup>1</sup> Suchandra Mukherjee,<sup>2</sup> Aritra Banerjee<sup>1,2</sup>  
and Prasun Mukherjee<sup>1,\*</sup>

<sup>1</sup> Centre for Research in Nanoscience and Nanotechnology, University of Calcutta, JD-2,  
Sector-III, Salt Lake, Kolkata-700106, West Bengal, India

<sup>2</sup> Department of Physics, University of Calcutta, 92, Acharya Prafulla Chandra Road,  
Kolkata-700009, West Bengal, India

E-mail: pmcrnn@caluniv.ac.in, pmukherjee12@gmail.com

**Table S1.** The elemental composition of the nanoparticles (NPs) studied in the pre-cation exchange reaction condition.<sup>a</sup>

|           |                            | [Zn(Tb)S] : [Hg <sup>2+</sup> ] = 1:10 <sup>M</sup> [M = -12 to -2] |            |            |            |            |            |            |                            |                            |                            |                            |
|-----------|----------------------------|---------------------------------------------------------------------|------------|------------|------------|------------|------------|------------|----------------------------|----------------------------|----------------------------|----------------------------|
|           |                            | M                                                                   |            |            |            |            |            |            |                            |                            |                            |                            |
|           | Zn(Tb)S                    | -12                                                                 | -11        | -10        | -9         | -8         | -7         | -6         | -5                         | -4                         | -3                         | -2                         |
| <b>Zn</b> | 35.5 ± 0.9<br>(35.9 ± 0.4) | 33.9 ± 2.9                                                          | 35.0 ± 2.5 | 35.0 ± 3.7 | 34.7 ± 2.5 | 31.2 ± 1.7 | 35.2 ± 2.1 | 38.5 ± 2.4 | 44.0 ± 0.2                 | 33.1 ± 3.9                 | 42.8 ± 0.7                 | 27.9 ± 3.0                 |
| <b>Tb</b> | 3.1 ± 0.2<br>(6.3 ± 0.2)   | 3.3 ± 0.2                                                           | 3.2 ± 0.3  | 3.4 ± 0.1  | 3.1 ± 0.4  | 5.0 ± 0.4  | 4.5 ± 0.6  | 4.6 ± 0.2  | 5.8 ± 1.1                  | 4.6 ± 0.9                  | 5.9 ± 0.3                  | 5.4 ± 0.5                  |
| <b>S</b>  | 61.4 ± 0.8<br>(57.8 ± 0.4) | 61.7 ± 3.0                                                          | 60.5 ± 2.5 | 60.5 ± 3.5 | 60.8 ± 2.0 | 62.1 ± 1.9 | 58.8 ± 2.2 | 54.2 ± 2.6 | 46.3 ± 2.1                 | 58.3 ± 2.8                 | 47.8 ± 0.9                 | 61.9 ± 3.2                 |
| <b>Hg</b> | ----                       | 1.2 ± 0.1                                                           | 1.3 ± 0.1  | 1.2 ± 0.2  | 1.4 ± 0.2  | 1.7 ± 0.1  | 1.5 ± 0.1  | 2.7 ± 0.1  | 4.0 ± 0.9                  | 4.0 ± 0.3                  | 3.5 ± 0.1                  | 4.8 ± 0.3                  |
|           |                            | [Zn(Tb)S] : [Pb <sup>2+</sup> ] = 1:10 <sup>M</sup> <sup>b</sup>    |            |            |            |            |            |            |                            |                            |                            |                            |
|           |                            | M                                                                   |            |            |            |            |            |            |                            |                            |                            |                            |
|           | Zn(Tb)S                    | -12                                                                 | -11        | -10        | -9         | -8         | -7         | -6         | -5                         | -4                         | -3                         | -2                         |
| <b>Zn</b> | 35.5 ± 0.9<br>(35.9 ± 0.4) | 40.7 ± 0.4                                                          | 36.6 ± 1.9 | 39.5 ± 0.7 | 36.6 ± 3.0 | 31.2 ± 3.3 | 30.7 ± 4.2 | 31.1 ± 4.8 | 35.1 ± 3.3<br>(28.3 ± 5.3) | 29.3 ± 2.2<br>(32.3 ± 3.1) | 30.0 ± 3.3<br>(19.6 ± 3.2) | 30.2 ± 0.8<br>(32.2 ± 2.1) |
| <b>Tb</b> | 3.1 ± 0.2<br>(6.3 ± 0.2)   | 2.7 ± 0.3                                                           | 3.6 ± 0.3  | 3.2 ± 0.3  | 3.5 ± 0.3  | 4.3 ± 0.4  | 4.4 ± 0.7  | 4.7 ± 0.9  | 3.6 ± 0.8<br>(4.5 ± 0.4)   | 3.8 ± 0.3<br>(5.4 ± 0.1)   | 4.3 ± 0.4<br>(4.7 ± 0.5)   | 4.8 ± 0.6<br>(6.0 ± 1.0)   |
| <b>S</b>  | 61.4 ± 0.8<br>(57.8 ± 0.4) | 54.9 ± 0.3                                                          | 58.1 ± 2.1 | 55.4 ± 0.8 | 58.0 ± 2.7 | 62.8 ± 3.6 | 63.1 ± 3.9 | 62.2 ± 4.6 | 59.7 ± 2.7<br>(66.6 ± 5.6) | 65.8 ± 2.4<br>(61.5 ± 3.1) | 64.5 ± 3.3<br>(74.4 ± 3.8) | 62.6 ± 0.9<br>(59.8 ± 2.3) |
| <b>Pb</b> | ----                       | 1.7 ± 0.2                                                           | 1.7 ± 0.1  | 1.9 ± 0.1  | 1.8 ± 0.2  | 1.7 ± 0.1  | 1.7 ± 0.2  | 2.0 ± 0.1  | 1.7 ± 0.2<br>(0.5 ± 0.1)   | 1.2 ± 0.1<br>(0.8 ± 0.5)   | 1.2 ± 0.2<br>(1.3 ± 0.4)   | 2.5 ± 0.2<br>(2.0 ± 0.1)   |

<sup>a</sup> The values were obtained from multiple areas of the sample and are reported as average and standard deviations.

<sup>b</sup> The values within parentheses are taken from our previous work on Zn(Tb)S/Pb NPs. [RSC Adv. 2018, 8, 18093-18108]

**Table S2.** The elemental composition of the nanoparticles (NPs) studied in the cation exchange reaction condition.<sup>a</sup>

|           |                         | <b>[Zn(Tb)S] : [Hg<sup>2+</sup>] = 1:10<sup>M</sup> [M = -1 to 10]</b> |                         |                         |
|-----------|-------------------------|------------------------------------------------------------------------|-------------------------|-------------------------|
|           |                         | <b>M</b>                                                               |                         |                         |
|           | <b>Zn(Tb)S</b>          | <b>-1</b>                                                              | <b>0</b>                | <b>1</b>                |
| <b>Zn</b> | 35.5 ± 0.9 (35.9 ± 0.4) | 25.2 ± 5.3                                                             | ----                    | ----                    |
| <b>Tb</b> | 3.1 ± 0.2 (6.3 ± 0.2)   | 6.0 ± 0.7                                                              | 1.3 ± 0.3               | 2.1 ± 0.4               |
| <b>S</b>  | 61.4 ± 0.8 (57.8 ± 0.4) | 55.8 ± 7.3                                                             | 50.6 ± 1.0              | 41.2 ± 1.3              |
| <b>Hg</b> | ----                    | 13.0 ± 1.4                                                             | 48.1 ± 1.3              | 56.8 ± 1.2              |
|           |                         | <b>[Zn(Tb)S] : [Pb<sup>2+</sup>] = 1:10<sup>Mb</sup></b>               |                         |                         |
|           |                         | <b>M</b>                                                               |                         |                         |
|           | <b>Zn(Tb)S</b>          | <b>-1</b>                                                              | <b>0</b>                | <b>1</b>                |
| <b>Zn</b> | 35.5 ± 0.9 (35.9 ± 0.4) | 27.0 ± 1.5 (34.1 ± 2.4)                                                | ---- (----)             | ---- (----)             |
| <b>Tb</b> | 3.1 ± 0.2 (6.3 ± 0.2)   | 3.9 ± 0.3 (6.8 ± 1.0)                                                  | 3.0 ± 0.2 (1.3 ± 0.7)   | 1.4 ± 0.2 ( ---- )      |
| <b>S</b>  | 61.4 ± 0.8 (57.8 ± 0.4) | 62.8 ± 1.7 (48.1 ± 3.6)                                                | 65.7 ± 2.5 (44.8 ± 5.1) | 58.4 ± 1.7 (45.9 ± 1.2) |
| <b>Pb</b> | ----                    | 6.3 ± 0.8 (11.1 ± 0.8)                                                 | 31.2 ± 2.3 (53.8 ± 4.7) | 40.2 ± 1.5 (54.2 ± 1.2) |

<sup>a</sup> The values were obtained from multiple areas of the sample and are reported as average and standard deviations.

<sup>b</sup> The values within parentheses are taken from our previous work on Zn(Tb)S/Pb NPs. [RSC Adv. 2018, 8, 18093-18108] These values indicate that the elemental compositions in the Zn(Tb)S/Hg and Zn(Tb)S/Pb NPs following the cation exchange reaction is similar. We interpret the variation in the elemental composition in the [Zn(Tb)S] : [Hg<sup>2+</sup>] / [Pb<sup>2+</sup>] = 1:1 and 1:10 due to batch to batch variation. For example, a source of such variation can arise from amount of post-synthetically cation addition from solution. Nonetheless, both these data track complete exchange of Zn<sup>2+</sup> by Hg<sup>2+</sup> / Pb<sup>2+</sup>.

**Table S3.** The elemental composition of the NPs from the inductively coupled atomic emission spectroscopy (ICP-AES).<sup>a</sup>

| <b>[Zn(Tb)S] : [Pb<sup>2+</sup>] = 1:10<sup>M</sup></b> | <b>Concentration of elements (ppb)</b> |            |
|---------------------------------------------------------|----------------------------------------|------------|
| <b>M</b>                                                | <b>Zn</b>                              | <b>Pb</b>  |
| -8                                                      | 44442 ± 176                            | 9.8 ± 0.8  |
| -6                                                      | 43937 ± 64                             | 21.7 ± 0.9 |
| -4                                                      | 43440 ± 177                            | 92.0 ± 1.0 |
| -2                                                      | 42312 ± 226                            | 3871 ± 9   |

<sup>a</sup> The elemental composition values are reported as average and standard deviations from three measurements, and are corrected for background contributions.

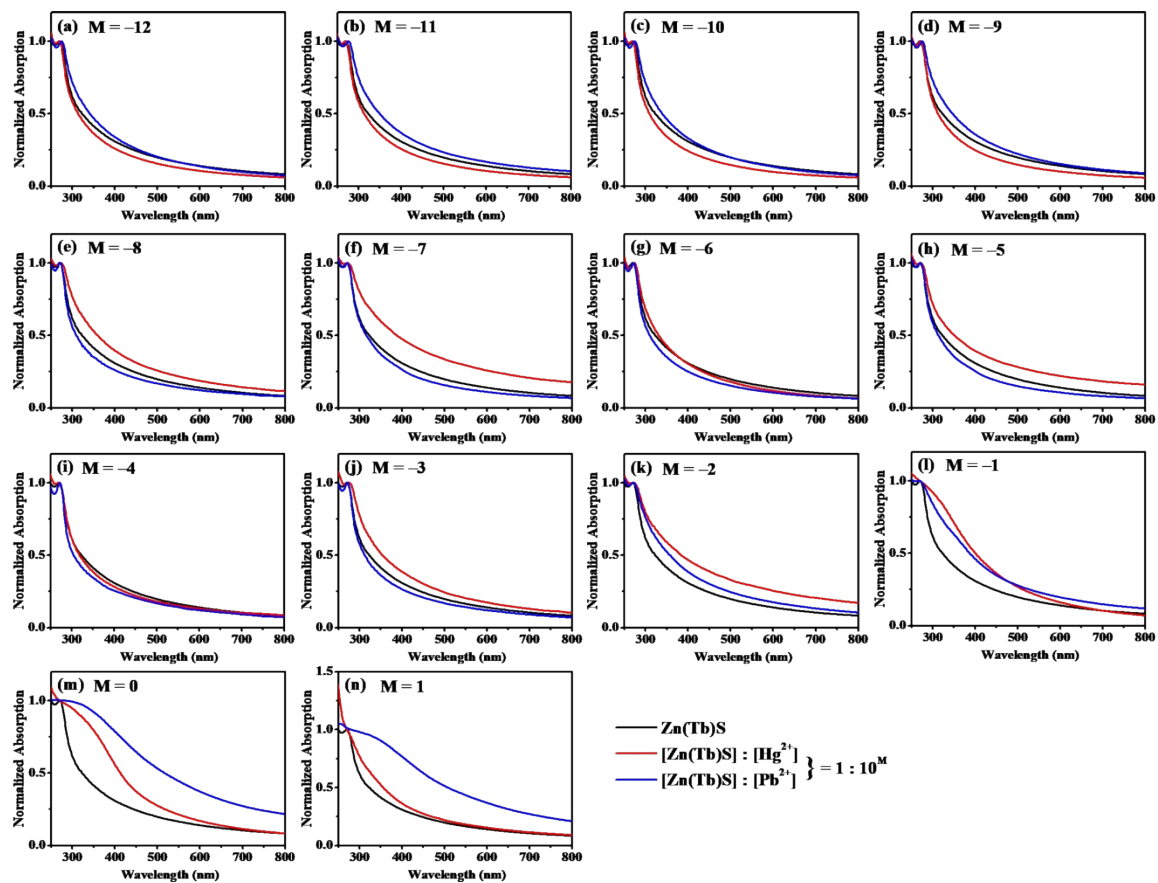

**Figure S1.** A comparison of the electronic absorption spectra of the Zn(Tb)S/Hg and Zn(Tb)S/Pb NPs are shown. The spectrum of the Zn(Tb)S NPs is included in all the panels for better comparison.

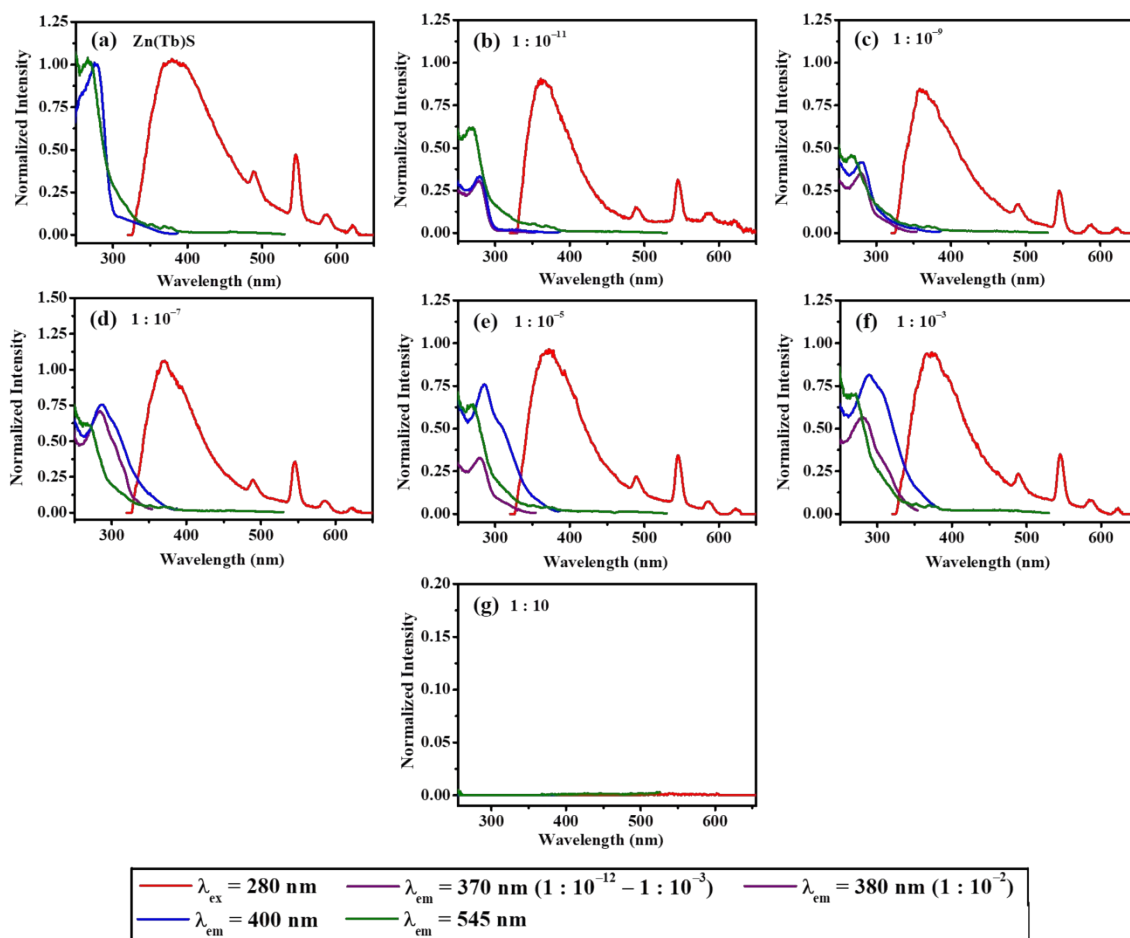

**Figure S2.** Steady-state photoluminescence spectra of the Zn(Tb)S NPs and the post-synthetically modified NPs with varying ratios of [Zn(Tb)S] : [Hg<sup>2+</sup>] are shown.

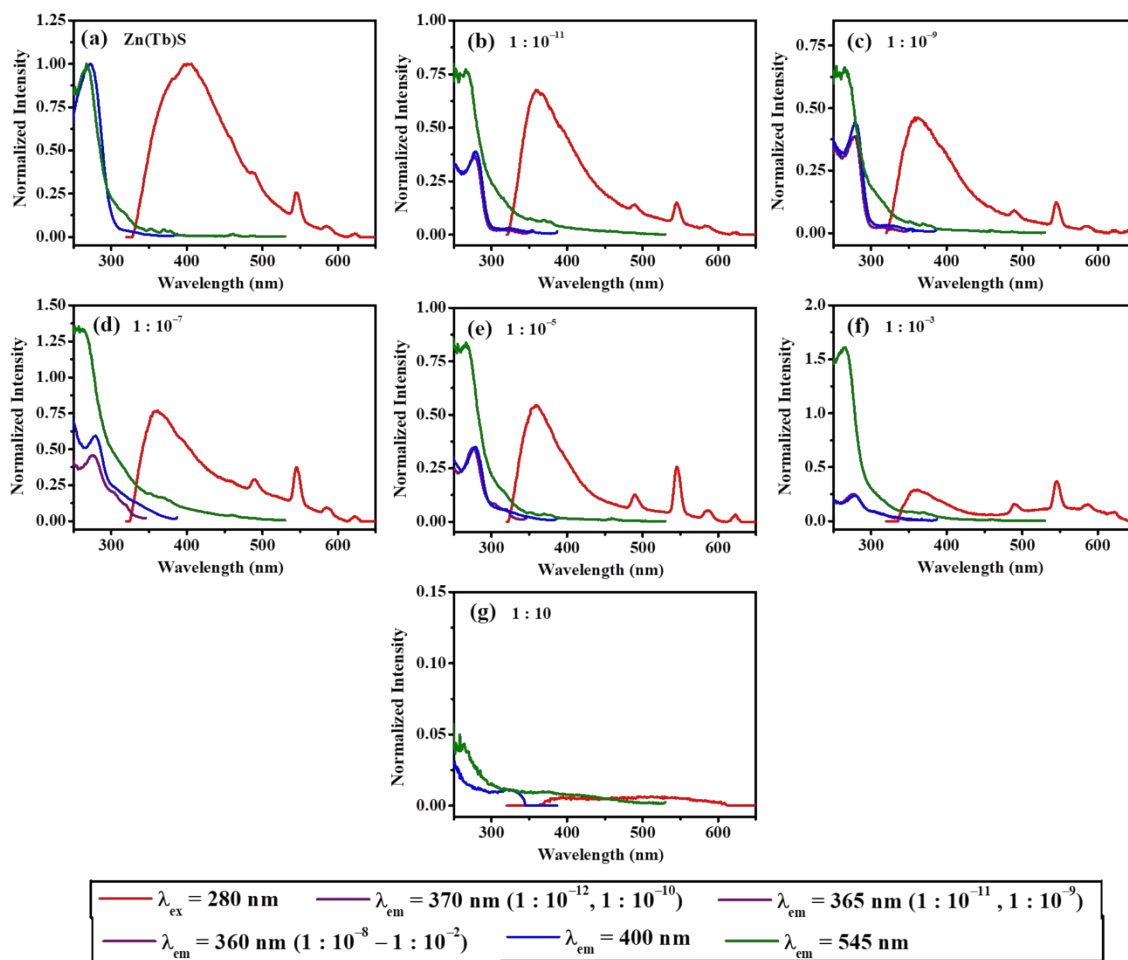

**Figure S3.** Steady-state photoluminescence spectra of the Zn(Tb)S NPs and the post-synthetically modified NPs with varying ratios of  $[Zn(Tb)S] : [Pb^{2+}]$  are shown.

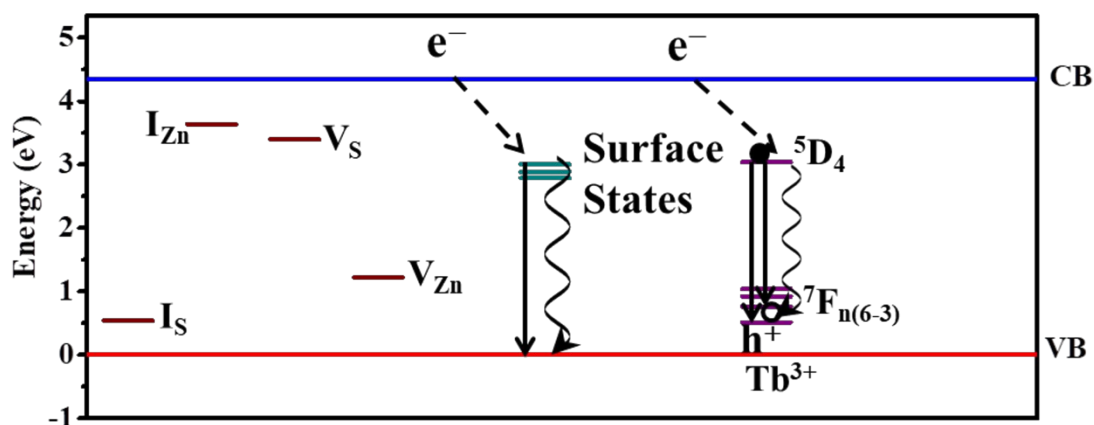

**Figure S4.** An energy level diagram summarizing key photophysical processes in the Zn(Tb)S NPs is shown.

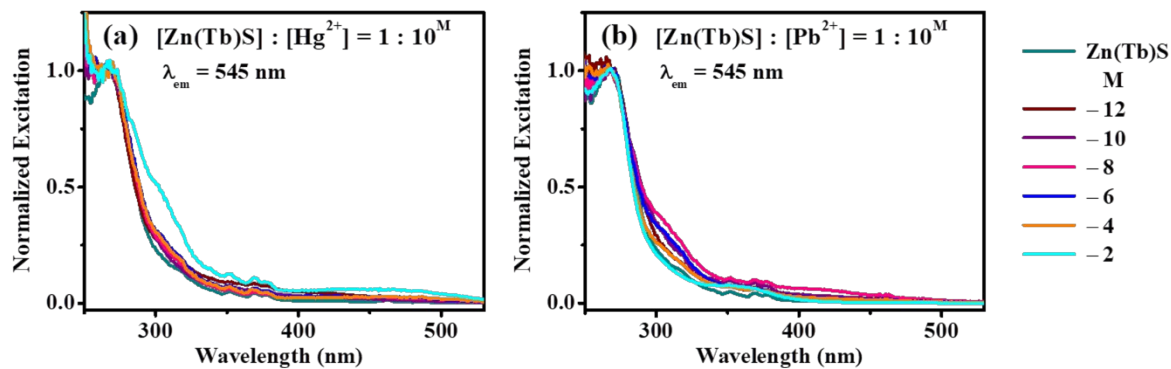

**Figure S5.** The normalized excitation spectra of the Zn(Tb)S/Hg and Zn(Tb)S/Pb NPs are shown in panels (a) and (b), respectively.

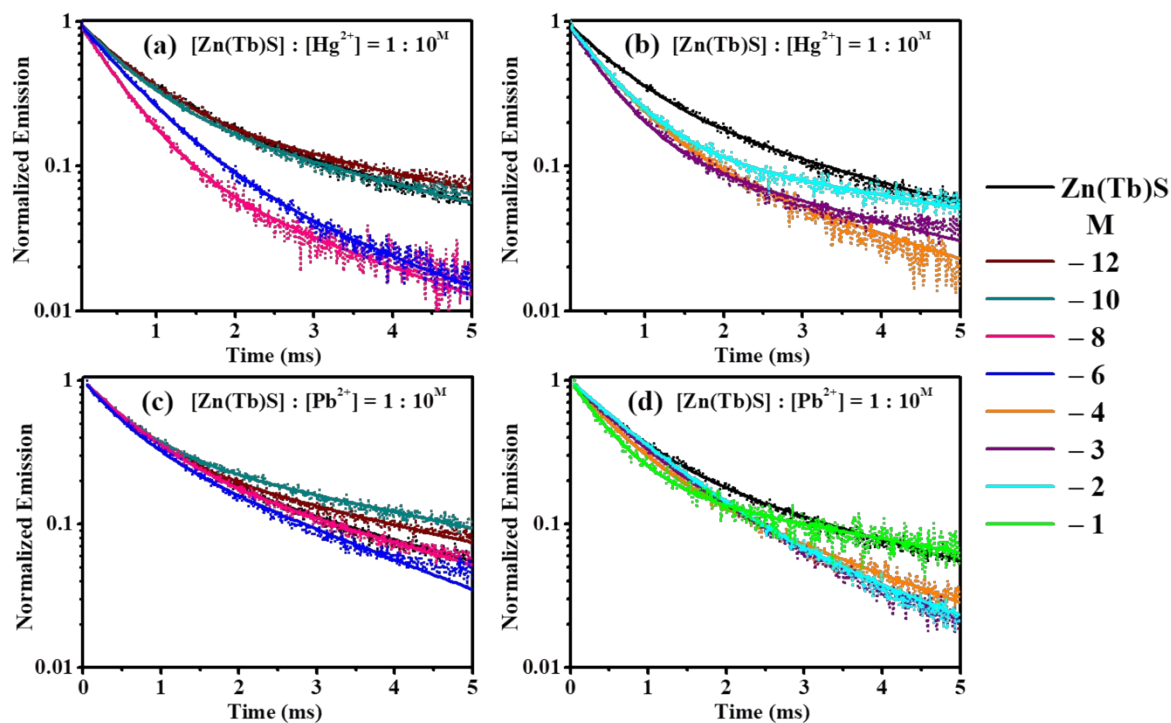

**Figure S6.**  $Tb^{3+}$  emission decay profiles in different NPs are shown.

**Table S4. Lifetime Decay Parameters of Tb<sup>3+</sup> Emission in the Zn(Tb)S/M [M = Hg / Pb] NPs.<sup>a</sup>**

|                                 | Sample                | a <sub>1</sub> | τ <sub>1</sub> (ms) | a <sub>2</sub> | τ <sub>2</sub> (ms) | <τ> (ms) <sup>b</sup> | R <sup>2</sup> |
|---------------------------------|-----------------------|----------------|---------------------|----------------|---------------------|-----------------------|----------------|
|                                 | Zn(Tb)S               | 0.73 ± 0.05    | 0.70 ± 0.07         | 0.27 ± 0.05    | 3.10 ± 0.03         | 1.30 ± 0.17           | 0.997          |
| [Zn(Tb)S] : [Hg <sup>2+</sup> ] | 1 : 10 <sup>-12</sup> | 0.73 ± 0.04    | 0.62 ± 0.06         | 0.27 ± 0.04    | 4.1 ± 0.14          | 1.60 ± 0.21           | 0.996          |
|                                 | 1 : 10 <sup>-10</sup> | 0.76 ± 0.01    | 0.63 ± 0.01         | 0.24 ± 0.01    | 2.90 ± 0.64         | 1.20 ± 0.16           | 0.999          |
|                                 | 1 : 10 <sup>-8</sup>  | 0.92 ± 0.04    | 0.51 ± 0.04         | 0.08 ± 0.04    | 2.10 ± 0.28         | 0.64 ± 0.09           | 0.997          |
|                                 | 1 : 10 <sup>-6</sup>  | 0.83 ± 0.07    | 0.61 ± 0.05         | 0.17 ± 0.07    | 2.40 ± 0.07         | 0.90 ± 0.18           | 0.998          |
|                                 | 1 : 10 <sup>-4</sup>  | 0.80 ± 0.05    | 0.56 ± 0.04         | 0.20 ± 0.05    | 2.60 ± 0.07         | 1.00 ± 0.14           | 0.997          |
|                                 | 1 : 10 <sup>-3</sup>  | 0.86 ± 0.01    | 0.46 ± 0.01         | 0.14 ± 0.01    | 3.30 ± 0.14         | 0.86 ± 0.04           | 0.998          |
|                                 | 1 : 10 <sup>-2</sup>  | 0.87 ± 0.01    | 0.54 ± 0.01         | 0.13 ± 0.01    | 4.90 ± 0.03         | 1.11 ± 0.05           | 0.997          |
| [Zn(Tb)S] : [Pb <sup>2+</sup> ] | 1 : 10 <sup>-12</sup> | 0.69 ± 0.01    | 0.53 ± 0.09         | 0.31 ± 0.01    | 3.9 ± 0.42          | 1.60 ± 0.15           | 0.995          |
|                                 | 1 : 10 <sup>-10</sup> | 0.67 ± 0.01    | 0.49 ± 0.11         | 0.34 ± 0.01    | 4.0 ± 0.07          | 1.67 ± 0.09           | 0.996          |
|                                 | 1 : 10 <sup>-8</sup>  | 0.70 ± 0.14    | 0.55 ± 0.13         | 0.30 ± 0.01    | 2.7 ± 0.28          | 1.20 ± 0.15           | 0.996          |
|                                 | 1 : 10 <sup>-6</sup>  | 0.66 ± 0.04    | 0.49 ± 0.04         | 0.34 ± 0.04    | 2.2 ± 0.07          | 1.07 ± 0.10           | 0.996          |
|                                 | 1 : 10 <sup>-4</sup>  | 0.72 ± 0.04    | 0.59 ± 0.01         | 0.28 ± 0.04    | 2.3 ± 0.02          | 1.06 ± 0.10           | 0.997          |
|                                 | 1 : 10 <sup>-3</sup>  | 0.72 ± 0.01    | 0.72 ± 0.07         | 0.28 ± 0.01    | 2.0 ± 0.14          | 1.08 ± 0.06           | 0.999          |
|                                 | 1 : 10 <sup>-2</sup>  | 0.84 ± 0.01    | 0.83 ± 0.01         | 0.16 ± 0.01    | 2.7 ± 0.07          | 1.13 ± 0.03           | 0.999          |
|                                 | 1 : 10 <sup>-1</sup>  | 0.78 ± 0.04    | 0.48 ± 0.01         | 0.22 ± 0.04    | 4.7 ± 0.21          | 1.40 ± 0.19           | 0.990          |

<sup>a</sup> The values are reported as the average and standard deviations from multiple measurements.

<sup>b</sup>  $\langle \tau \rangle = a_1 \tau_1 + a_2 \tau_2$ .

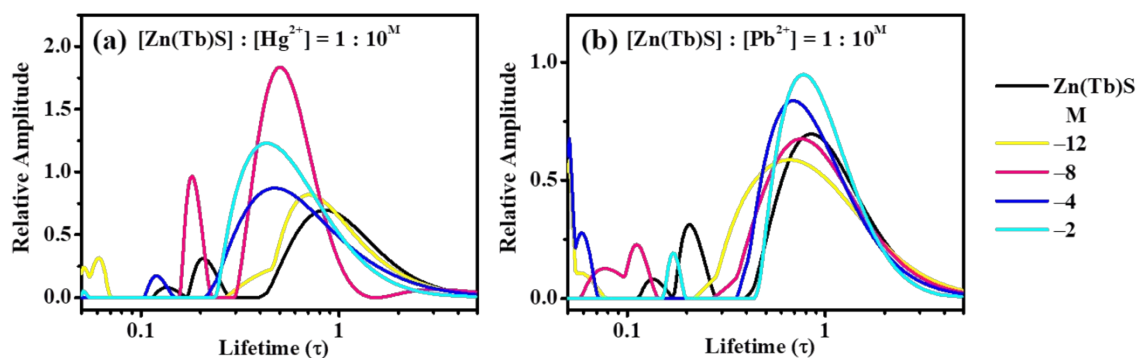

**Figure S7.** Lifetime distribution profiles of the Zn(Tb)S NPs with post-synthetic addition of Hg<sup>2+</sup> and Pb<sup>2+</sup> are shown in panels (a) and (b), respectively.



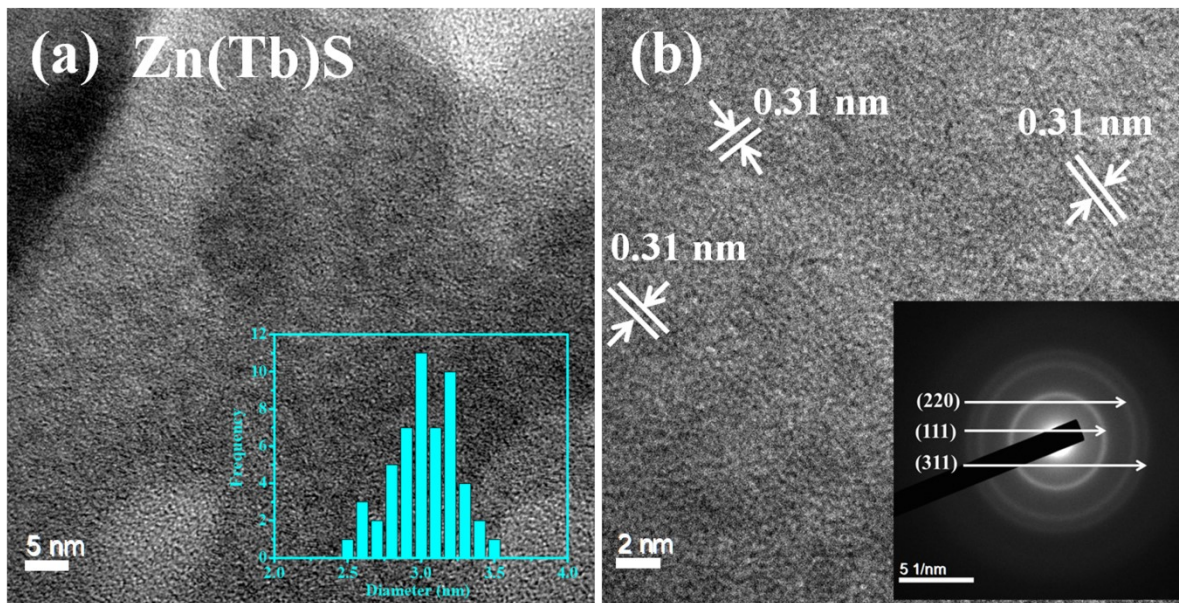

**[Zn(Tb)S] : [Hg<sup>2+</sup>]**

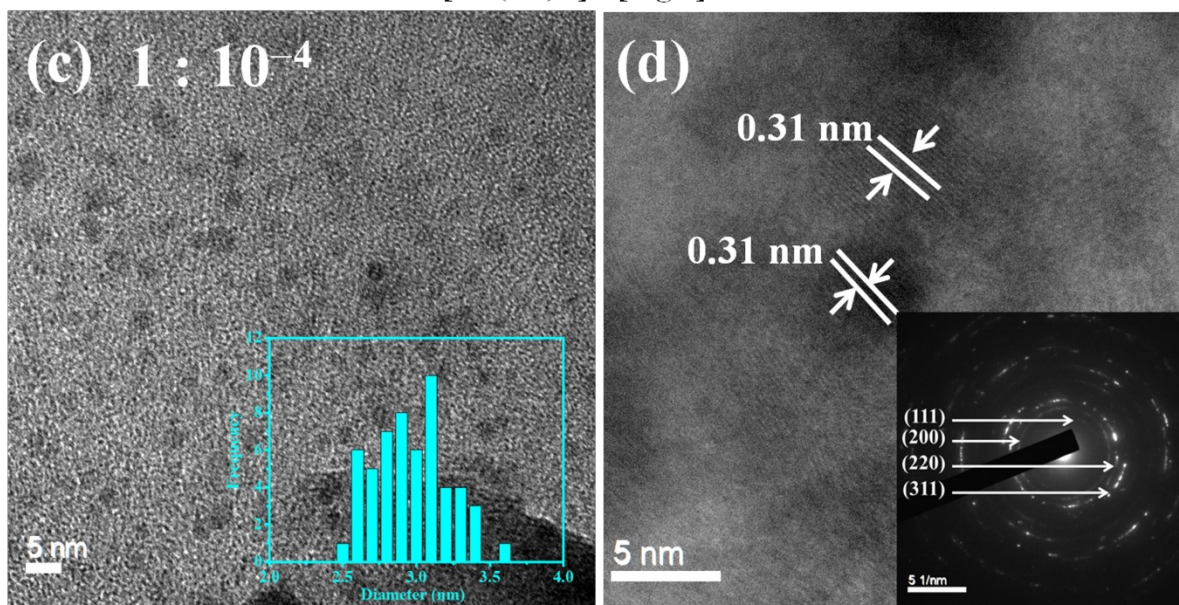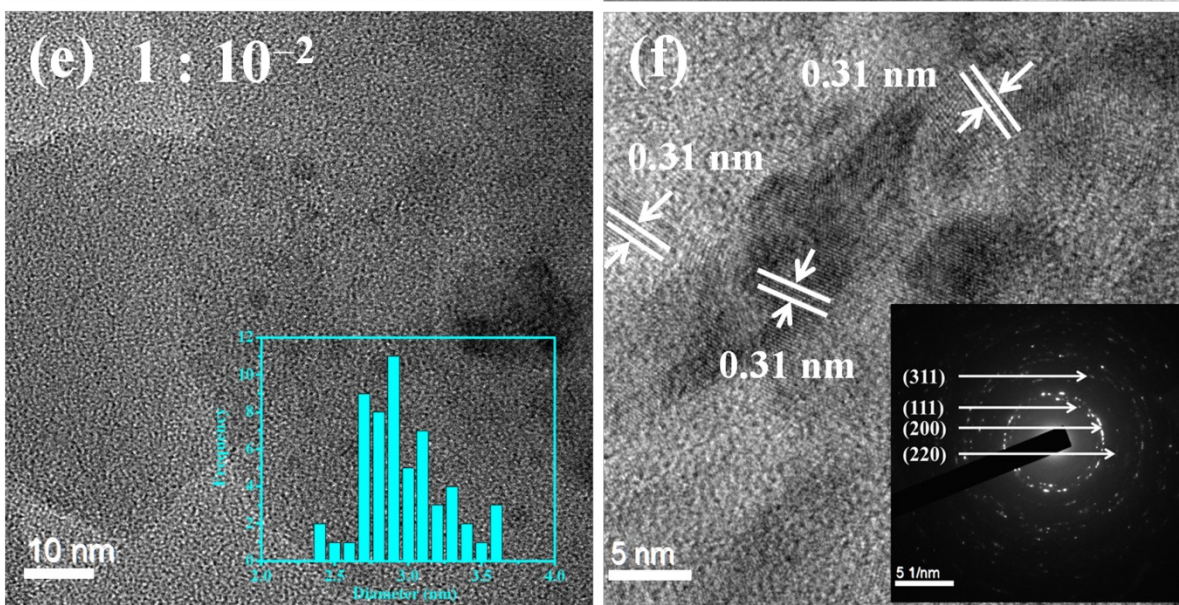

**Figure S8.** The TEM with size distribution in the inset, HRTEM with SAED pattern in the inset are shown for the Zn(Tb)S, and the samples with [Zn(Tb)S] : [Hg<sup>2+</sup>] = 1:10<sup>-4</sup> and 1:10<sup>-2</sup>.

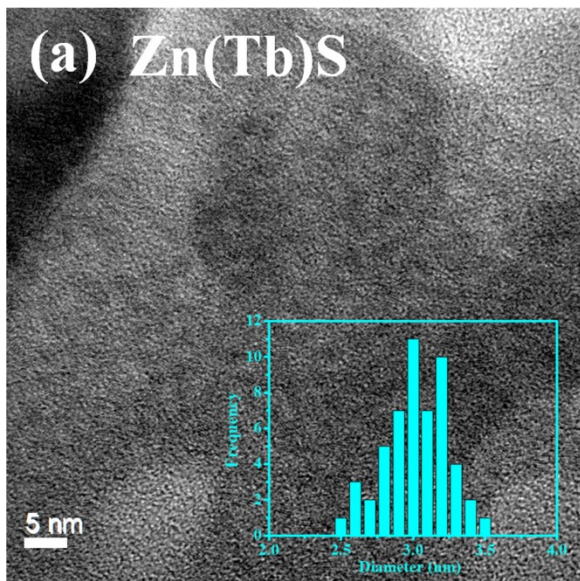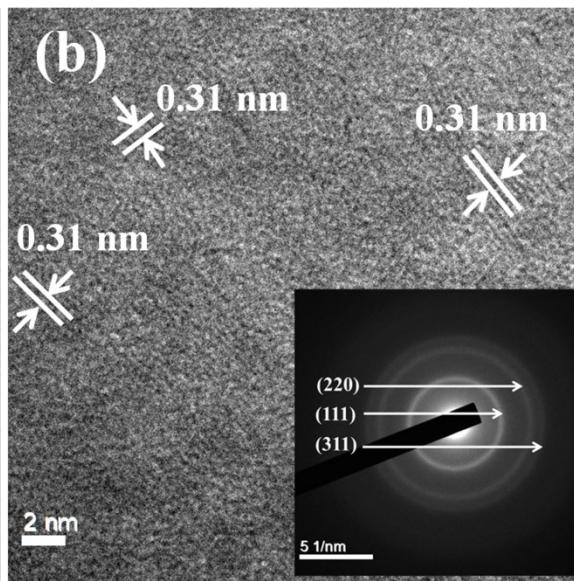

**[Zn(Tb)S] : [Pb<sup>2+</sup>]**

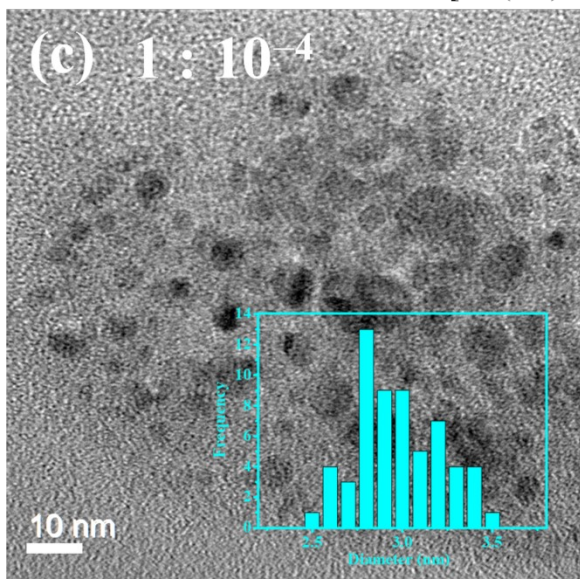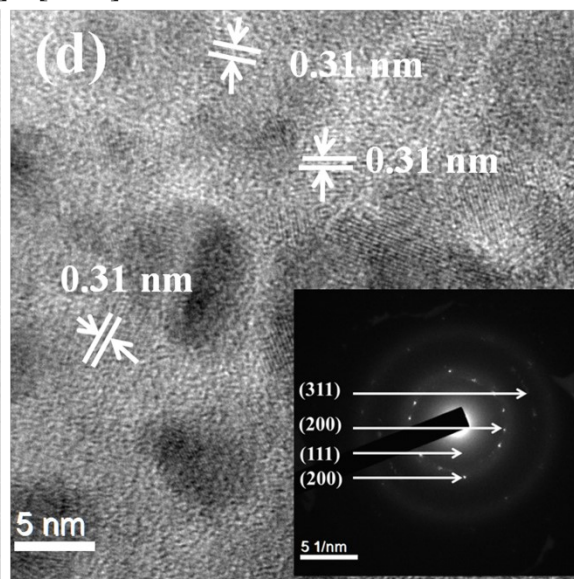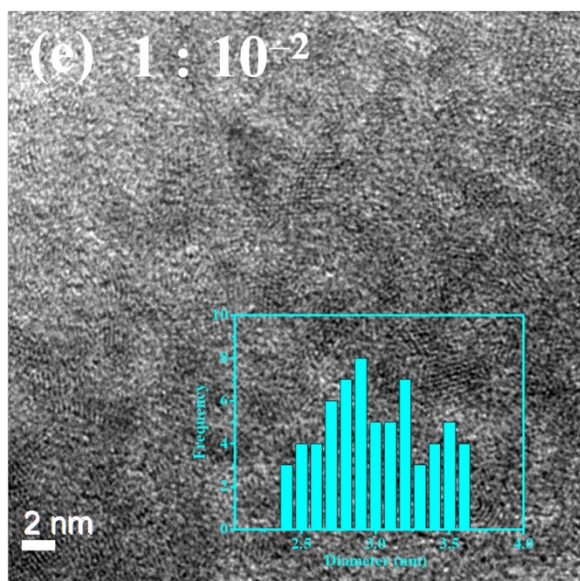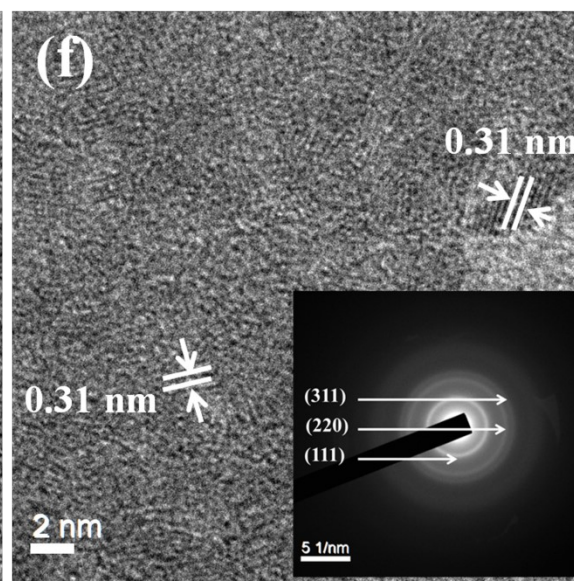

**Figure S9.** The TEM with size distribution in the inset, HRTEM with SAED pattern in the inset are shown for the Zn(Tb)S, and the samples with  $[\text{Zn(Tb)S}] : [\text{Pb}^{2+}] = 1:10^{-4}$  and  $1:10^{-2}$ .

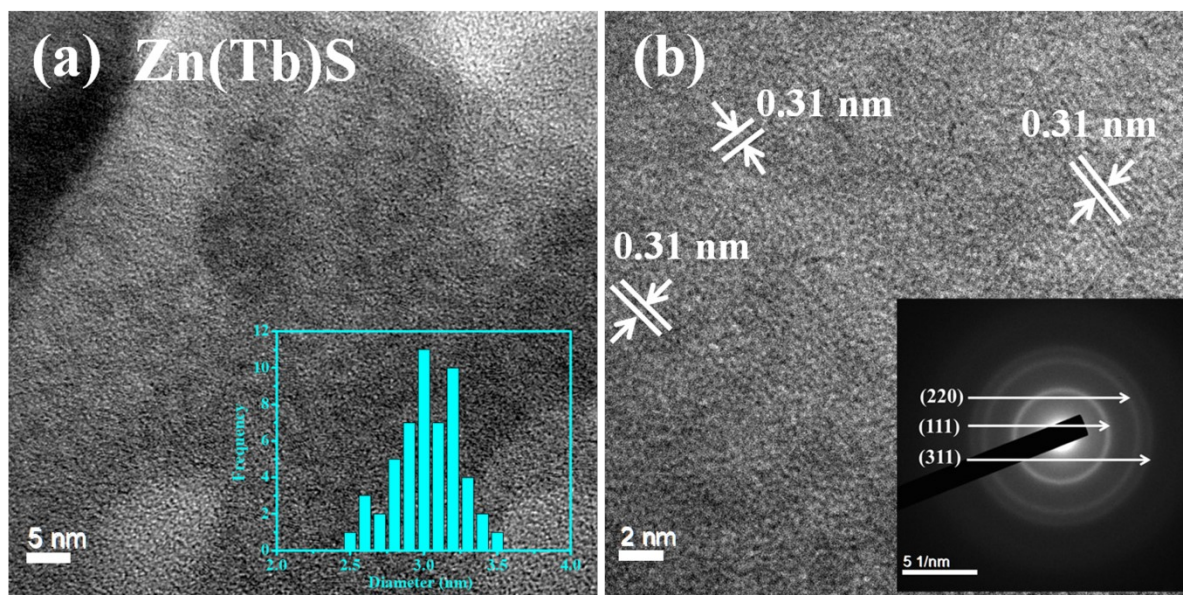

**[Zn(Tb)S] : [Hg<sup>2+</sup>]**

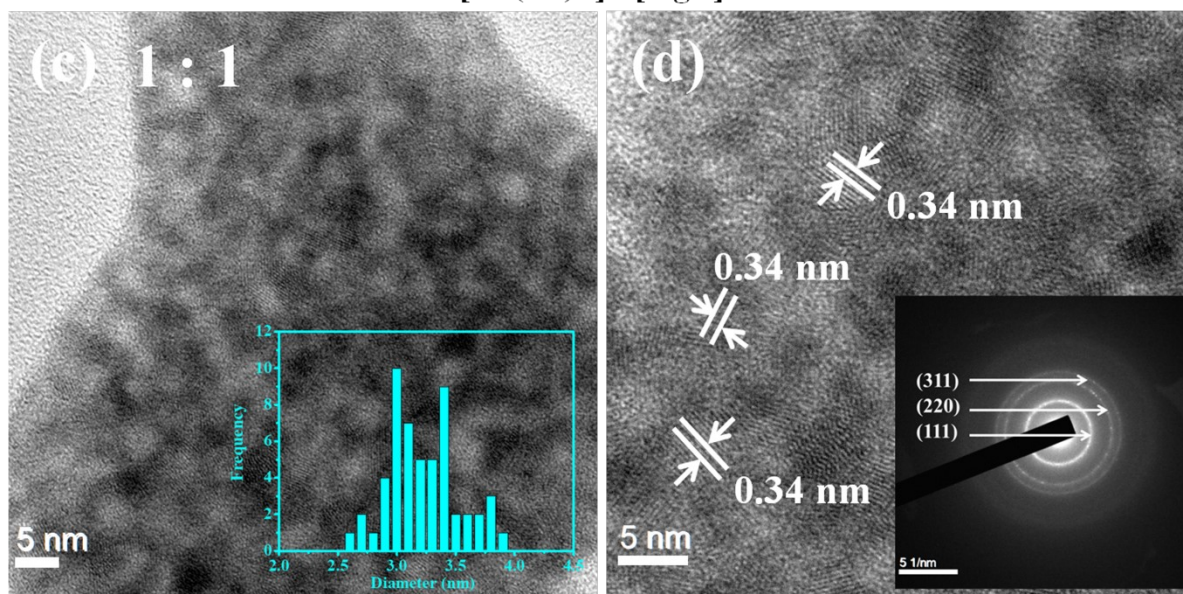

**Figure S10.** The TEM with size distribution in the inset, HRTEM with SAED pattern in the inset are shown for the Zn(Tb)S, and the samples with  $[\text{Zn(Tb)S}] : [\text{Hg}^{2+}] = 1:1$ .

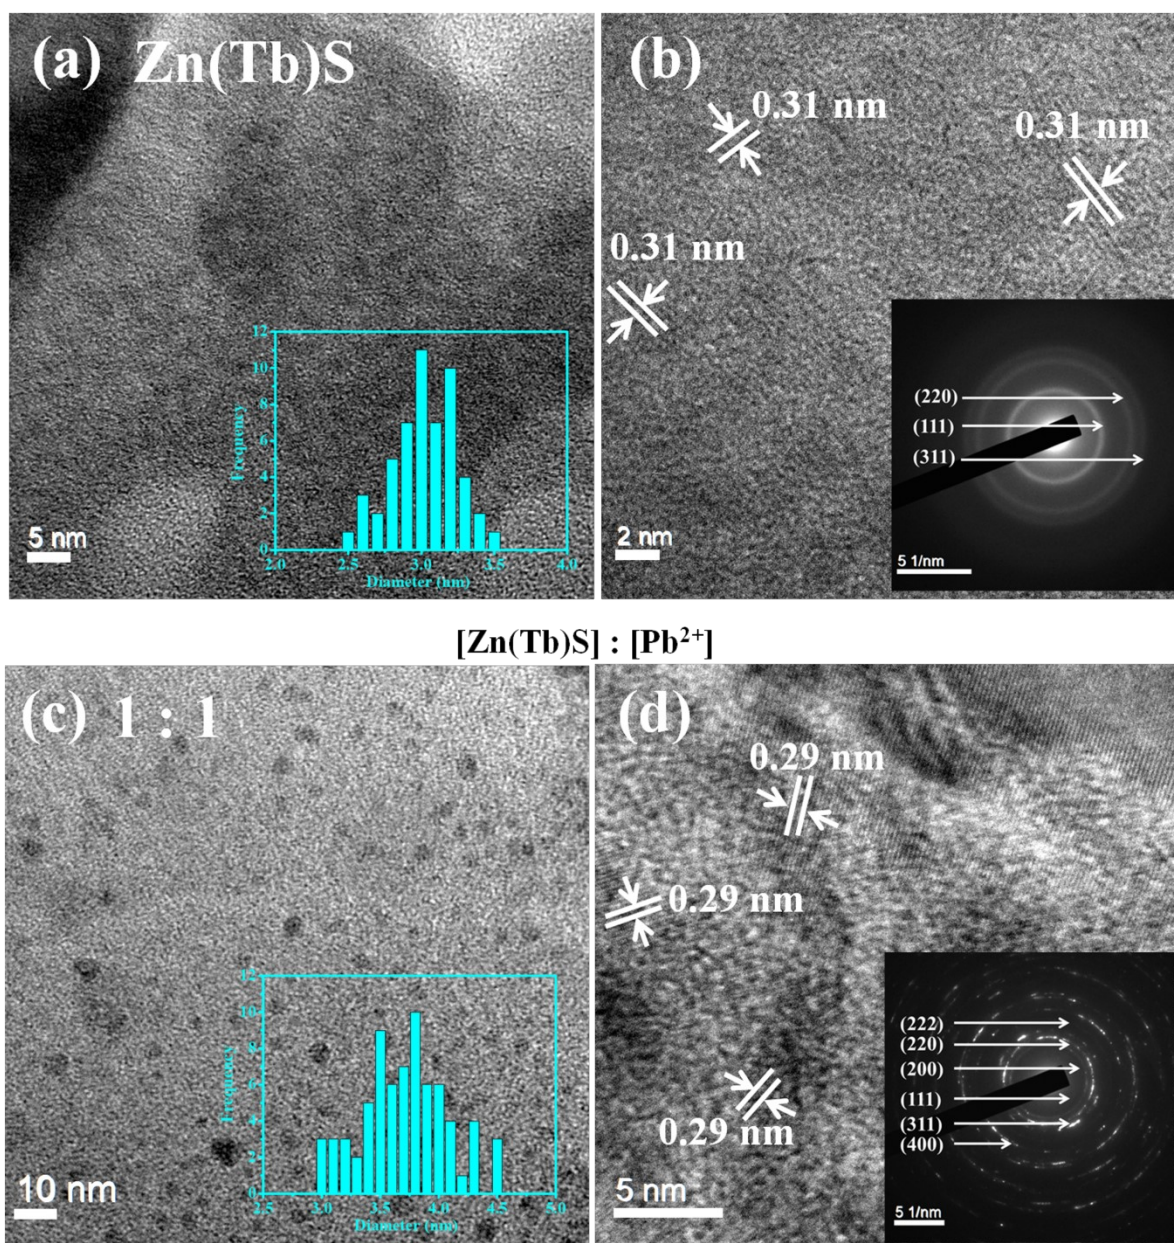

**Figure S11.** The TEM with size distribution in the inset, HRTEM with SAED pattern in the inset are shown for the Zn(Tb)S, and the samples with [Zn(Tb)S] : [Pb<sup>2+</sup>] = 1:1.
